# Supplementary material
Source: PubMed Central journal article supplement (PMC3668699)
Supplement: NIHMS468365-supplement-1.pdf [file NIHMS468365-supplement-1.pdf]

**Table S1**

| <b>Decoys</b>            | <b><math>K_a</math> (1/Ms)</b> | <b><math>K_d</math>(1/s)</b> | <b><math>K_A</math>(1/M)</b> | <b><math>K_D</math>(M)</b> |
|--------------------------|--------------------------------|------------------------------|------------------------------|----------------------------|
| Parent<br>STAT3<br>decoy | $5.85 \times 10^4$             | $7.16 \times 10^{-3}$        | $8.17 \times 10^6$           | $1.22 \times 10^{-7}$      |
| DN4                      | $4.14 \times 10^4$             | $7.53 \times 10^{-3}$        | $5.50 \times 10^6$           | $1.82 \times 10^{-7}$      |
| DS18                     | $4.76 \times 10^4$             | $6.79 \times 10^{-3}$        | $7.02 \times 10^6$           | $1.42 \times 10^{-7}$      |
| Cyclic<br>STAT3<br>decoy | $2.90 \times 10^4$             | $7.28 \times 10^{-3}$        | $3.98 \times 10^6$           | $2.52 \times 10^{-7}$      |

**Supplementary Table S1**
