# Supplementary material
Source: PubMed Central journal article supplement (PMC3668699)
Supplement: NIHMS468365-supplement-2.pdf [file NIHMS468365-supplement-2.pdf]

**Table S2: EC<sub>50</sub> Values of Parental and Modified Decoys**

| Agent              | Hours | EC <sub>50</sub> values |             |           |
|--------------------|-------|-------------------------|-------------|-----------|
|                    |       | UMSCC-1 (nM)            | UM-22B (nM) | T-24 (nM) |
| Parent STAT3 decoy | 24    | 11.4                    | 11.6        | 8.5       |
| DN4                | 24    | 69.6                    | 71.4        | 60.1      |
| DS18               | 24    | 30                      | 12.4        | 15.8      |
| Cyclic STAT3 Decoy | 24    | 16.7                    | 25.2        | 9         |
| Parent STAT3 decoy | 48    | 10.3                    | 14.5        | 7.2       |
| DN4                | 48    | 46.2                    | 61.6        | 24.6      |
| DS18               | 48    | 24.5                    | 20.1        | 14.5      |
| Cyclic STAT3 Decoy | 48    | 14.7                    | 36.6        | 9.8       |
| Parent STAT3 decoy | 72    | 11.4                    | 10.1        | 7.5       |
| DN4                | 72    | 42.5                    | 62.1        | 26.2      |
| DS18               | 72    | 22.9                    | 19.3        | 9.6       |
| Cyclic STAT3 Decoy | 72    | 11.2                    | 26.2        | 9         |

**Supplementary Table S2**
